# Supplementary material for: Ingenuity pathway analysis of differentially expressed genes involved in signaling pathways and molecular networks in RhoE gene-edited cardiomyocytes
Source: PubMed Central journal article supplement — Int J Mol Med. 2020 Jun 26;46(3):1225–38. doi: 10.3892/ijmm.2020.4661 (PMC7388835; doi:10.3892/ijmm.2020.4661), 2020-06-26
Supplement: Supplementary_Data1.pdf [file Supplementary_Data1.pdf]

Figure S1. Map diagrams of the lentiviral, packaging plasmid backbones and partial sequencing results of the sgRNAs. (A) Map of the lentiviral and packaging plasmid backbones. (B) The sequences of each of the sgRNAs used.

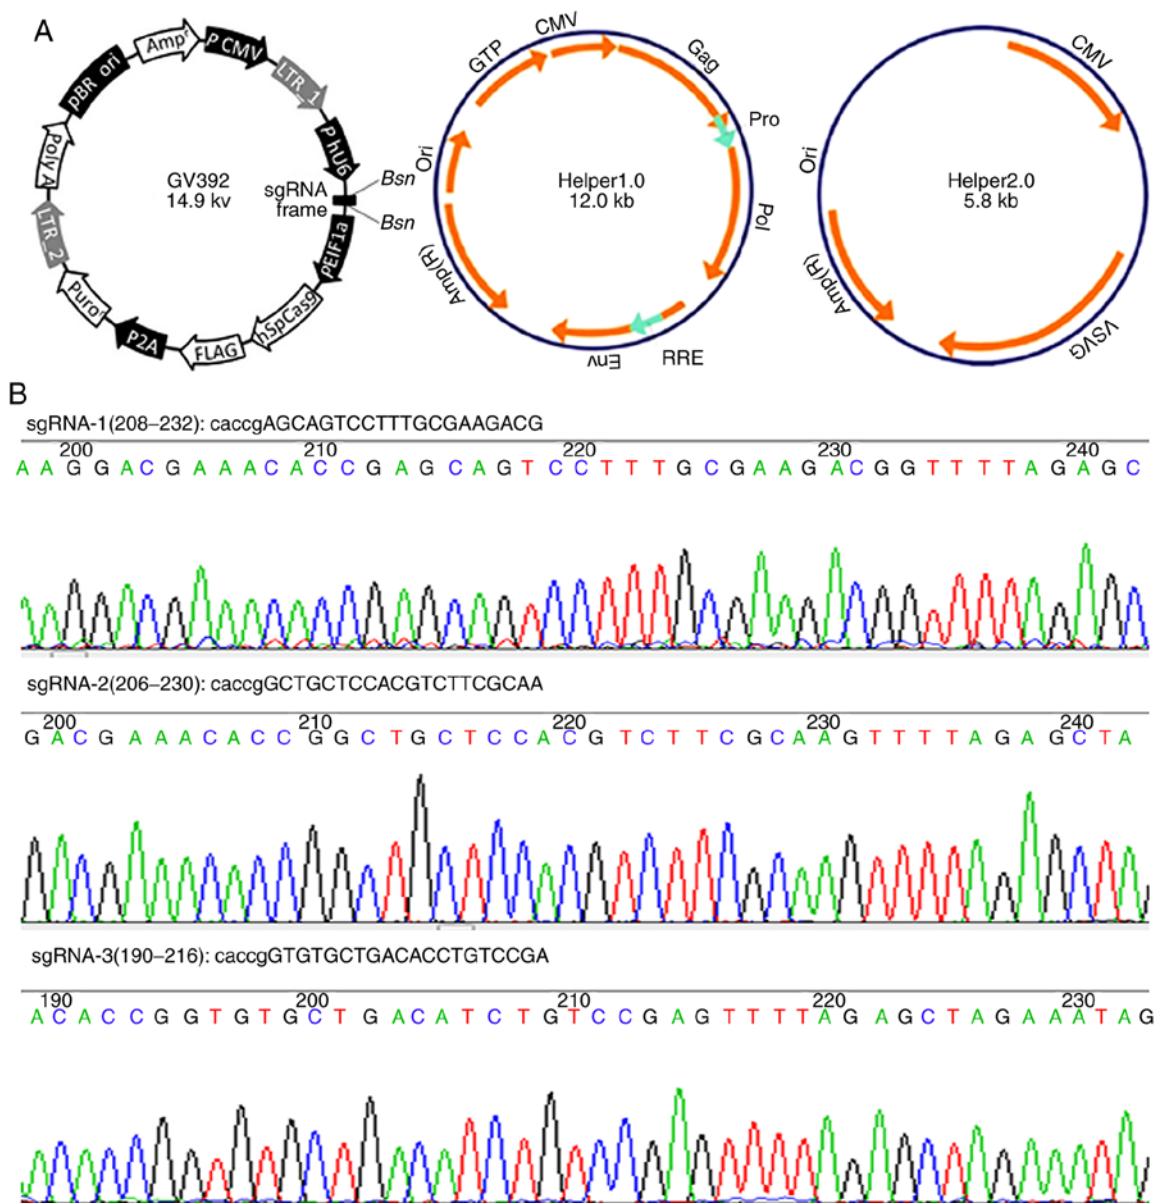

Figure S2. Quantity control of the RNA samples for use in chip assay. (A) RNA electrophoresis. Black bands from top to bottom represent 28S, 18S and 5S rRNA, respectively. (B) Agilent 2100 Bioanalyzer detection map results. Peaks from left to right represent the subunits of the ribosomes. Values on x-axis represent time (sec), and values on y-axis represent fluorescence intensity. (C) RNA concentration and purity. NC, negative control, cells transfected with scrambled sgRNA; KO, knockout.

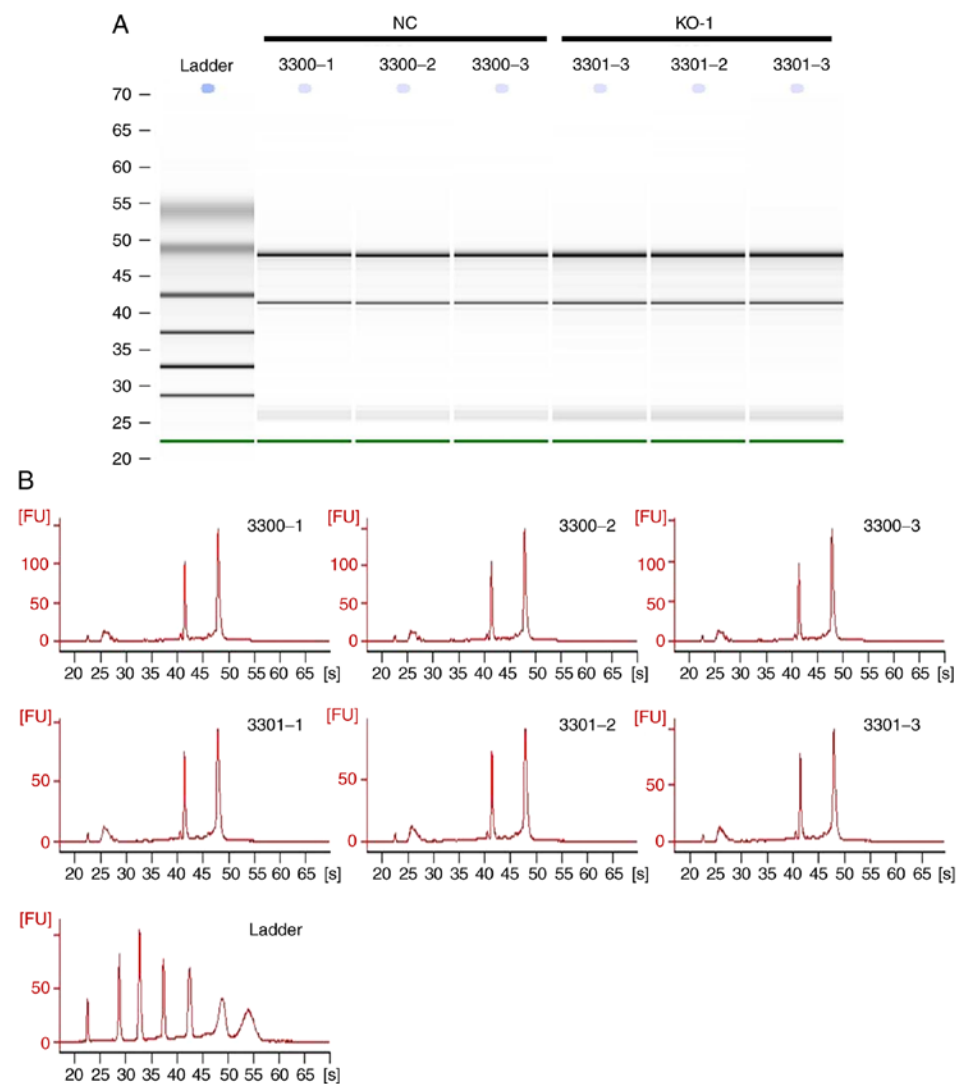

**C**

| Sample | Name | Thermo NanoDrop 200 |           | Agilent 2100 Bioanalyzer |         |
|--------|------|---------------------|-----------|--------------------------|---------|
|        |      | Concentration*      | A260/A280 | RIN                      | 28S/18S |
| 3300-1 | NC   | 1101.9              | 2.05      | 9.7                      | 1.9     |
| 3300-2 | NC   | 1193.6              | 2.04      | 9.7                      | 1.9     |
| 3300-3 | NC   | 1087.2              | 2.00      | 9.6                      | 1.8     |
| 3301-1 | KO   | 857.1               | 2.05      | 9.5                      | 2.2     |
| 3301-2 | KO   | 889.8               | 2.03      | 9.3                      | 2.2     |
| 3301-3 | KO   | 903.1               | 2.05      | 9.4                      | 2.3     |

\*Unit: ng/ $\mu$ l

Figure S3. Quantity control results of the chip signal. (A) Signal histogram. The x-axis indicates the probe expression value interval and the y-axis indicates the probe statistics in the expression value interval. (B) Relative signal emitted by each sample as indicated by the box plot. (C) Pearson's correlation analysis of fluorescence intensity signals emitted by each sample. Red color indicates high correlation and blue color indicates low correlation. (D) Principal components analysis. High similarity was observed within both NC and KO group, while large differences were observed between the NC and KO groups.

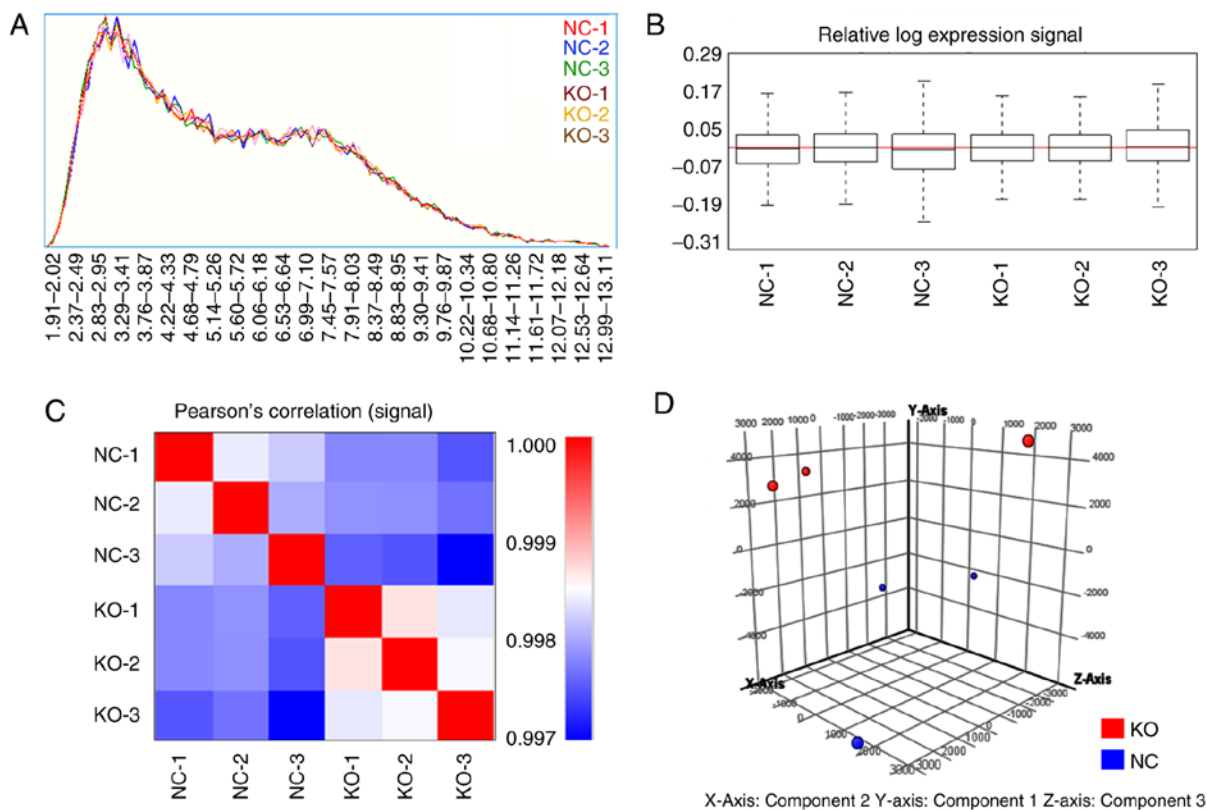

Table SI. Sequences of the RhoE- and NC-sgRNA oligos.

| No.            | 5'    | Stem                 | 3' |
|----------------|-------|----------------------|----|
| sgRNA-NC-a     | CACCg | CGCTTCCGCGGCCCGTTCAA |    |
| sgRNA-NC-b     | aaac  | TTGAACGGGCCGCGGAAGCG | c  |
| RhoE-sgRNA-1-a | CACCg | AGCAGTCCTTTGCGAAGACG |    |
| RhoE-sgRNA-1-b | aaac  | CGTCTTCGCAAAGGACTGCT | c  |
| RhoE-sgRNA-2-a | CACCg | GCTGCTCCACGTCTTCGCAA |    |
| RhoE-sgRNA-2-b | aaac  | TTGCGAAGACGTGGAGCAGC | c  |
| RhoE-sgRNA-3-a | CACCg | GTGTGCTGACATCTGTCCGA |    |
| RhoE-sgRNA-3-b | aaac  | TCGGACAGATGTCAGCACAC | c  |

sgRNA, single guide RNA.

Table SII. Sequences of PCR primers and fragments of products before and after Cruiser nuclease digestion.

| Number               | Primer sequence (5'→3')                          | Amplicon size (bp) | Fragment 1 (bp) | Fragment 2 (bp) |
|----------------------|--------------------------------------------------|--------------------|-----------------|-----------------|
| sgRNA-1 <sup>a</sup> | GTTGGAGAGGAGTAAAGAGCCG<br>TGAAGTGTCCCACAGGCTCAAC | 833                | 303             | 530             |
| sgRNA-2 <sup>a</sup> | GTTGGAGAGGAGTAAAGAGCCG<br>TGAAGTGTCCCACAGGCTCAAC | 833                | 298             | 535             |
| sgRNA-3              | GAACCACTGAGTCACGCAGAAT<br>TATCAACTGTGTGCCCTAACCC | 738                | 247             | 491             |

<sup>a</sup>sgRNA-1 and sgRNA-2 share the same pair of PCR primers. sgRNA, single guide RNA.

Table III. Sequences of primers used for the reverse transcription quantitative PCR validation of target genes.

| Gene           | Upstream (5'-3')       | Downstream (5'-3')      |
|----------------|------------------------|-------------------------|
| <i>GAPDH</i>   | TTCAACGGCACAGTCAAGG    | CTCAGCACCAGCATCACC      |
| <i>ELK1</i>    | CAAAGGGTGCAGGAATGAC    | TCTAAGGGGTTTGGACTGG     |
| <i>TIMP3</i>   | TTGCCTTGCTTTGTGACCT    | CGTAGTGTTTGGACTGATAG    |
| <i>IL6ST</i>   | AAATGTGGTCGGCAAGTCC    | GGTTTAGATGGCGGTGTCC     |
| <i>DNAJB12</i> | GTGATGGCGGGCTAGGAGT    | CCAGCAGTTGTTTCGGAGG     |
| <i>SOD3</i>    | GTGGCTCTGTCACCTGGAC    | GAGTGCGTGTTCGCCTATCT    |
| <i>FTH1</i>    | CCAGAACTACCACCAGGACTC  | CAGTTTCTCAGCATGTTCCCT   |
| <i>Ccnb1</i>   | GAACGGCTGTTAGTGTTTAGGT | ATTCTTGACTGTTTCGCTGACTT |
| <i>ADAM10</i>  | TTATGGGAATTGCCCTGAT    | GTGCCTGGAAGTGGTTTAG     |
| <i>CXCL12</i>  | ATATTCATCCGTGCCCTCG    | GCAATGCCACCACCTGTAAC    |
| <i>JAK2</i>    | TCAAGAGGGAAACATAAGGAA  | ATACCCGTCAATTAACGACAC   |
| <i>CDK2</i>    | CCTGGATGAAGACGGACGG    | GGGGCACTGGTTTAGTCACAT   |
| <i>CDK4</i>    | ATTGGTGTCCGTGCCTATG    | TCACGAACTGTGCTGACGG     |
| <i>CDK6</i>    | AGACCTCCTTCTGAAATGC    | GTCTTGGAAGTACGGGTGA     |
| <i>CCNA1</i>   | GCCAAGCATGGATTTGATA    | TCCTCTGCATATTCCGTTA     |
| <i>CCNE1</i>   | TGATTCAGCGTGCCTGGAC    | AAGACGGGAAGTGGGGAGG     |
| <i>SCAP</i>    | GACTGAAAGGCTTCGTGAG    | ATGATGGGAATGGGGTAGG     |
| <i>MAP3K1</i>  | GTTCCCTGTAAAATACCCT    | TAGTTTGCTTGTGCTACCC     |
| <i>CBL</i>     | AGCCTTGCTGTAACCTACCCTG | TGTAACGTACCCAATAGCCCAC  |
| <i>DUSP1</i>   | GTCCCAAGCAGTCATAACAAT  | GGTAGGTATGTCAAGCACGAAG  |
| <i>BCL2LL1</i> | AGGATCGGAGACGAGTTCAA   | CCATACCAGACGGAAGATGA    |
